## Enable Psychiatric News Brief

With the American Psychiatric Association's new flash briefing, *Psychiatric News Brief*, you can now listen to synopses of curated articles from *Psychiatric News*. Simply enable this skill and you can listen anytime you choose throughout your day by just saying "Alexa, what's my flash briefing" or "Alexa, tell me what's new".

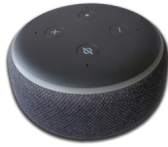

Flash briefing is a customizable Amazon skill that includes updates from your favorite content services. When you say, "Alexa, what's my flash briefing?" or "Alexa, what's the news," you'll hear updates from any organization that you have enabled.

Go to [psychnews.psychiatryonline.org/alexa](http://psychnews.psychiatryonline.org/alexa) to sign up now!

AMERICAN  
PSYCHIATRIC  
ASSOCIATION  
PUBLISHING

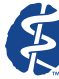

www.appi.org  
Email: [appi@psych.org](mailto:appi@psych.org)  
Phone: 1-800-368-5777

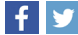

## PSYCHIATRISTS

INPATIENT • OUTPATIENT

\$266,844 - \$320,640  
Board Certified annual salary

\$260,004 - \$311,592  
Board Eligible annual salary

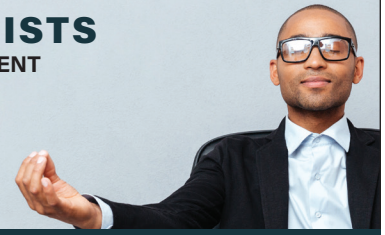

California Correctional Health Care Services is seeking proactive, knowledgeable psychiatrists to join our multidisciplinary teams. Within the California Department of Corrections and Rehabilitation's facilities, you will find like-minded professionals well-versed in the intricate psychiatric and medical interplay necessary to treat our diverse patient population. Here, you will see and develop treatment plans for cases you won't encounter in any other practice. And with the support of our dedicated medical assistants, you'll be able to devote your time to practicing and honing advanced psychopharmacological skills. Plus, with locations throughout California, you're sure to find your perfect fit.

### In return for your efforts, we offer:

- 40-hour workweek with flexible schedules, including 4/10s
- State of CA retirement that vests in five years (visit [CalPERS.ca.gov](http://CalPERS.ca.gov) for retirement formulas)
- Visa sponsorship opportunities
- \$10,000 Bonus to professionals newly hired with the State of CA
- Relocation assistance available to professionals newly hired with the State of CA

### Take the first step and contact us today:

LaTreae Phillips  
(916) 691-4818  
[CentralizedHiringUnit@cdcr.ca.gov](mailto:CentralizedHiringUnit@cdcr.ca.gov)

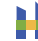

CALIFORNIA CORRECTIONAL  
HEALTH CARE SERVICES

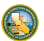

[www.cchcs.ca.gov](http://www.cchcs.ca.gov)

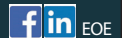

# APA JobCentral

The Career Hub for Psychiatry

## Manage Your Career

- Browse hundreds of active job listings!
- Create an account to save jobs, store multiple resumes and cover letters and communicate with employers through our internal messaging system.
- Set up multiple job alerts specifying your skills, interests and location to receive e-mails when employers post jobs that match your criteria.

## Recruit for Open Positions

- Post your job in front of thousands of highly qualified psychiatrists.
- Cross promote your job listing in *Psychiatric News*.
- Search the anonymous resume database to find your ideal candidate.

[jobs.psychiatry.org](http://jobs.psychiatry.org)

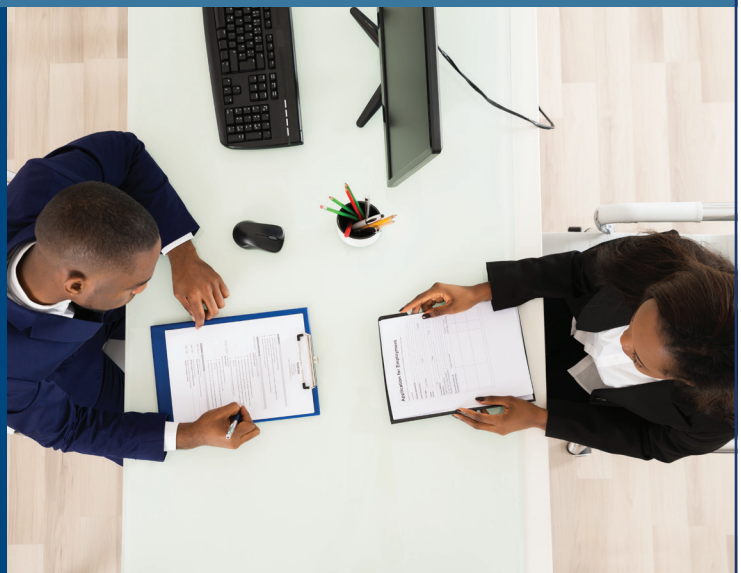

AMERICAN  
PSYCHIATRIC  
ASSOCIATION

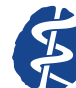

**JOBCENTRAL**

The Career Hub for Psychiatry

# Evidence

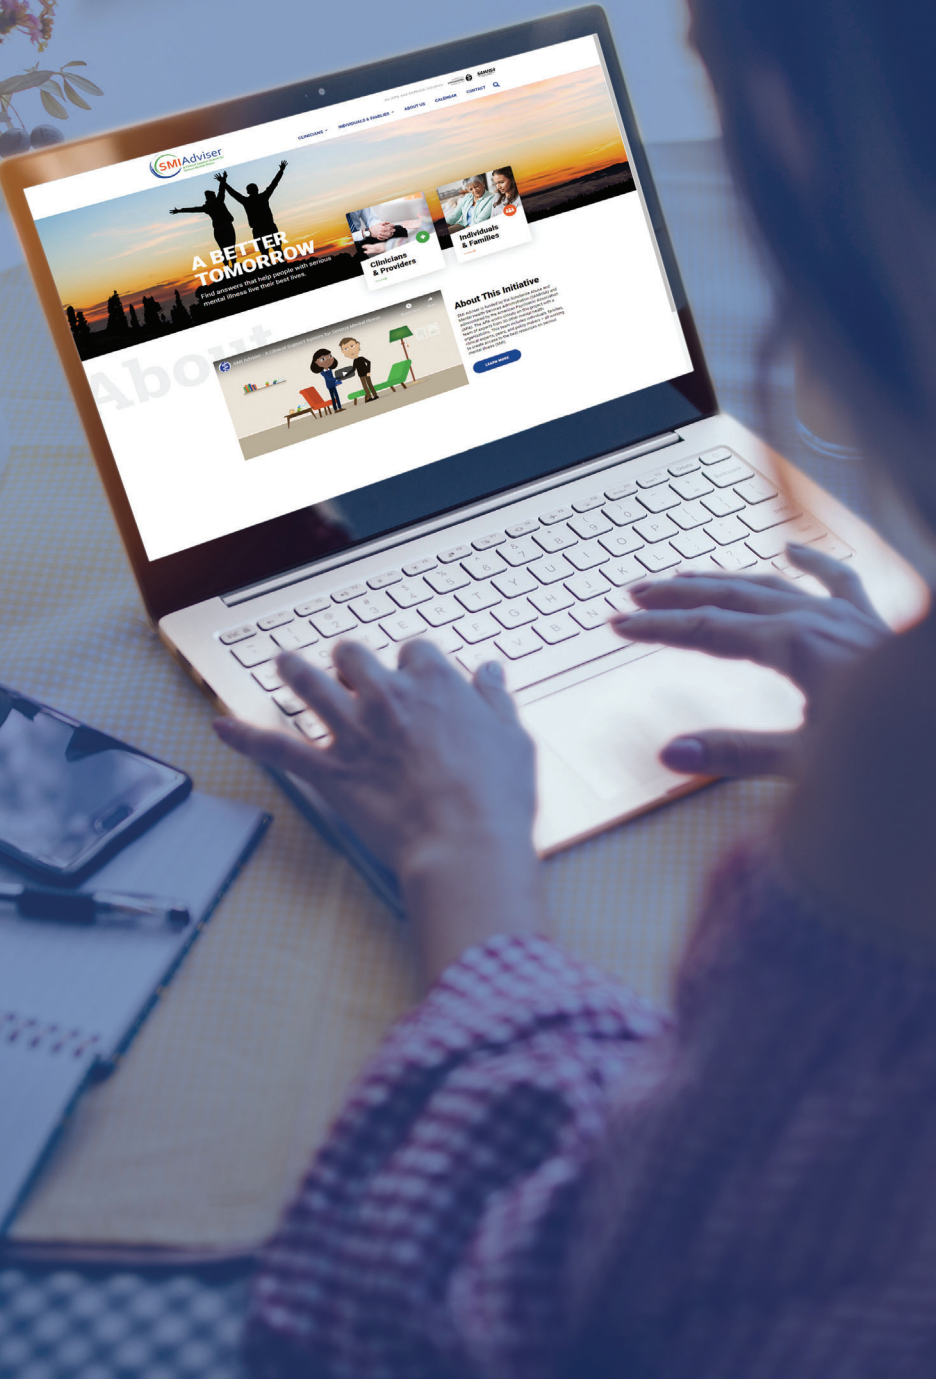

Serious mental illness (SMI) involves complex treatments. That means mental health clinicians often face complex decisions.

Now you can access SMI Adviser's free online catalog to find evidence-based education on SMI. Access 100+ on-demand courses. Attend monthly live webinars. Earn credits if you are a physician, nurse, psychologist, or social worker. And use this guidance to provide person-centered care to individuals who have SMI.

This is just one of many free resources from SMI Adviser.

**Better clinical support. Better resources. Better care for people who have SMI.**

**Join our #MissionForBetter at [SMIadviser.org](https://www.smiadviser.org)**

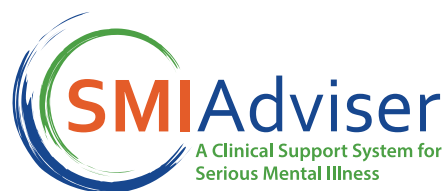

#### GRANT STATEMENT

Funding for this initiative was made possible (in part) by Grant No. 1H79SM080818-01 from SAMHSA. The views expressed in written conference materials or publications and by speakers and moderators do not necessarily reflect the official policies of the Department of Health and Human Services; nor does mention of trade names, commercial practices, or organizations imply endorsement by the U.S. Government.

© 2020 American Psychiatric Association. All rights reserved.

An APA and SAMHSA Initiative

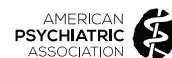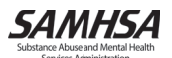

Source: http://ps.psychiatryonline.org/doi/suppl/10.1176/ps.2020.71.issue-9/suppl_file/back.pdf
